# Supplementary material for: Cauliflower-like NiFe alloys anchored on a flake iron nickel carbonate hydroxide heterostructure towards superior overall water and urea electrolysis
Source: Royal Society of Chemistry journal article supplement (doi:10.1039/d2nr05381k), 2022-11-23
Supplement: d2nr05381k1.pdf [file d2nr05381k1.pdf]

**Cauliflower-like NiFe alloys anchored on flake iron nickel carbonate hydroxide heterostructure towards superior overall water and urea electrolysis**

Xing Wang<sup>\*,1</sup>, Meiru Zhao<sup>1</sup>, Zhangquan Gong, Siyao Fang, Sheng Hu, Wei Pi, Haifeng Bao<sup>\*</sup>

School of Materials Science and Engineering, Key Laboratory for New Textile Materials and Applications of Hubei Province, State Key Laboratory of New Textile Materials and Advanced Processing Technologies, Wuhan Textile University, 430200 Wuhan, China

\*Corresponding author E-mail: [wx@wtu.edu.cn](mailto:wx@wtu.edu.cn), [baohai Feng@wtu.edu.cn](mailto:baohai Feng@wtu.edu.cn)

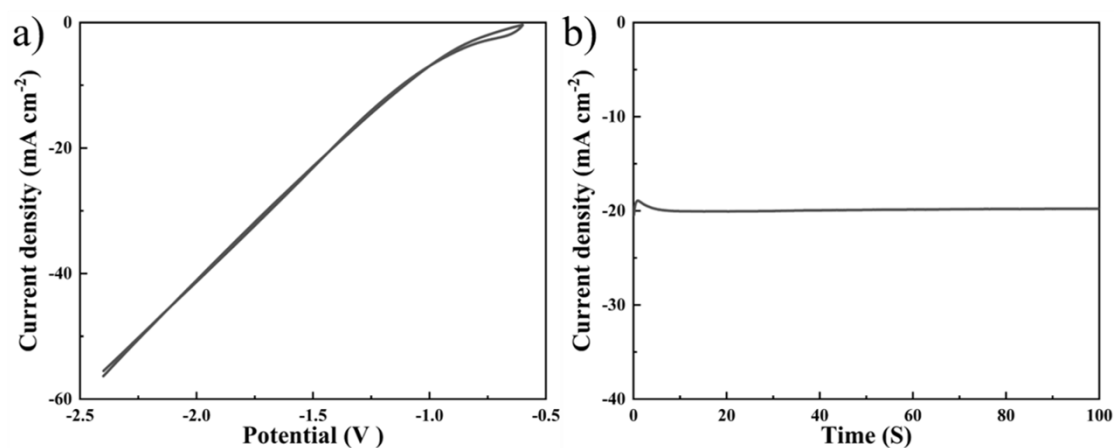

**Fig.S1.** The electrodeposition experiment of NiFe/NiFeCH/CC. (a) CV curve; (b) chronopotentiometric curve at a cathodic current density of 20 mA cm<sup>-2</sup> for 100 s.

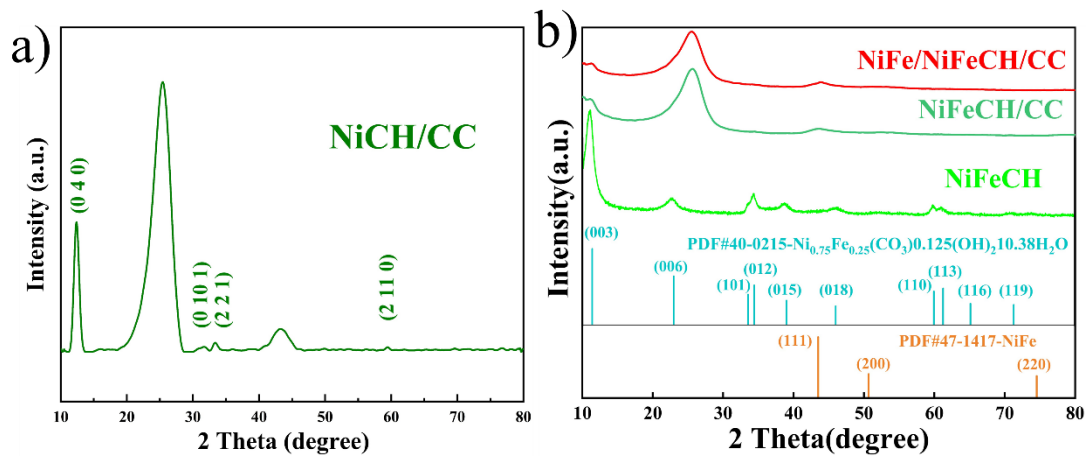

**Fig.S2.** (a) XRD pattern of NiCH/CC. (b) XRD patterns of powder NiFeCH, NiFeCH/CC and NiFe/NiFeCH/CC.

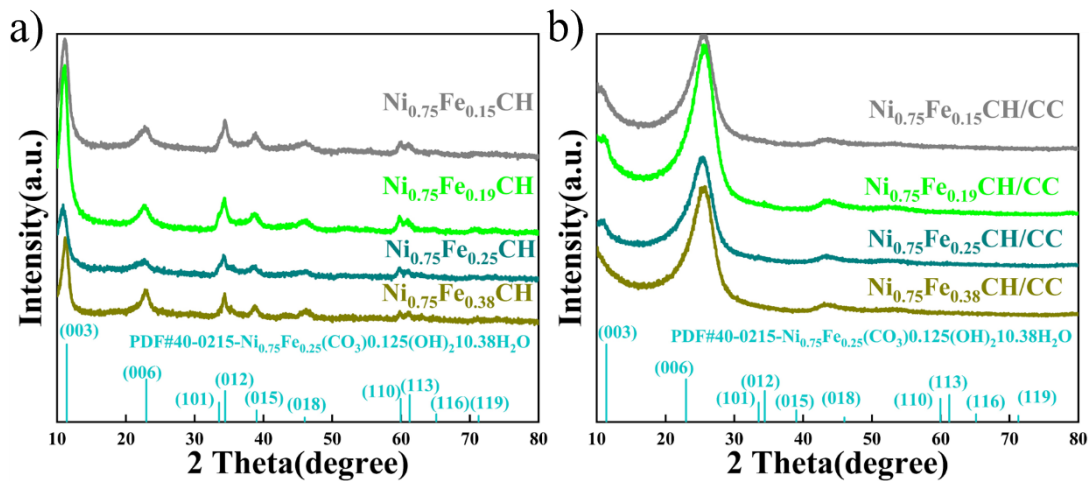

**Fig.S3.** (a) XRD patterns of powder NiFeCH collected from the precipitate after hydrothermal reaction with different proportions of Ni and Fe. (b) XRD patterns of the as-prepared NiFeCH/CC with different proportions of Ni and Fe.

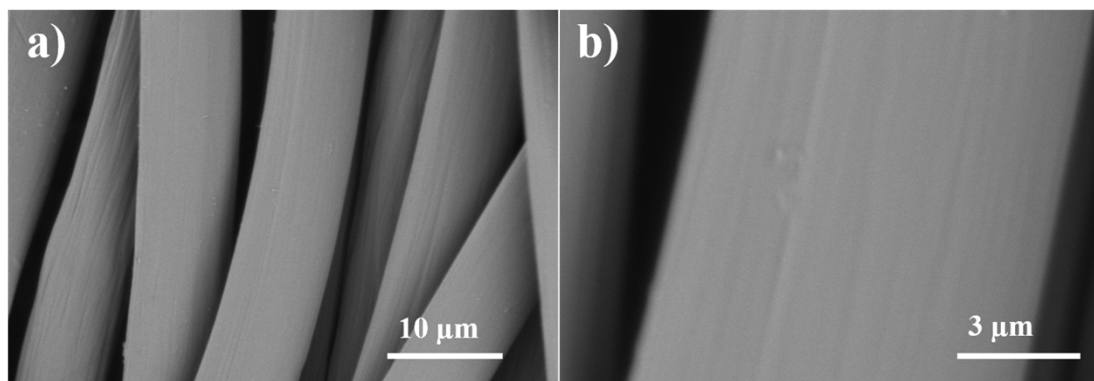

**Fig.S4.** SEM images of CC.

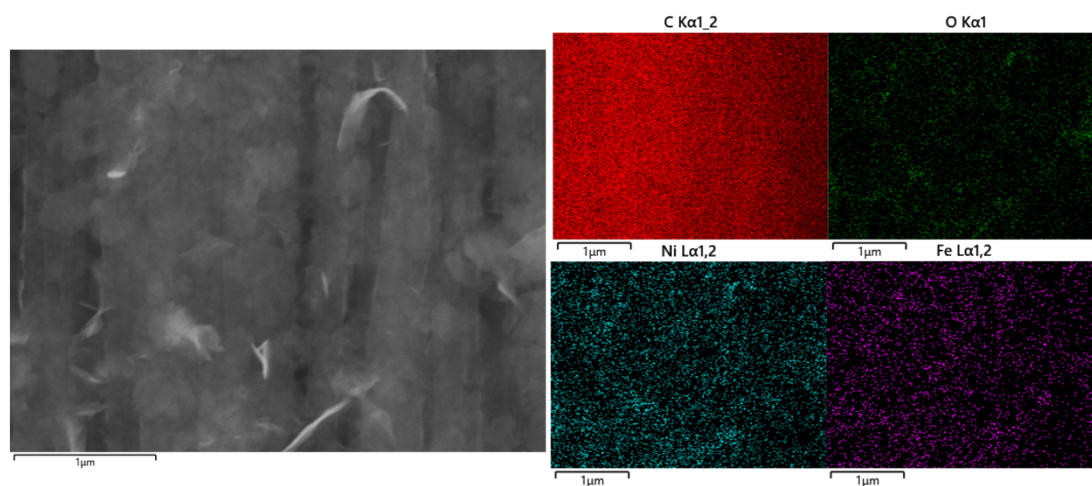

**Fig.S5.** Elemental mapping of NiFeCH/CC measured with SEM.

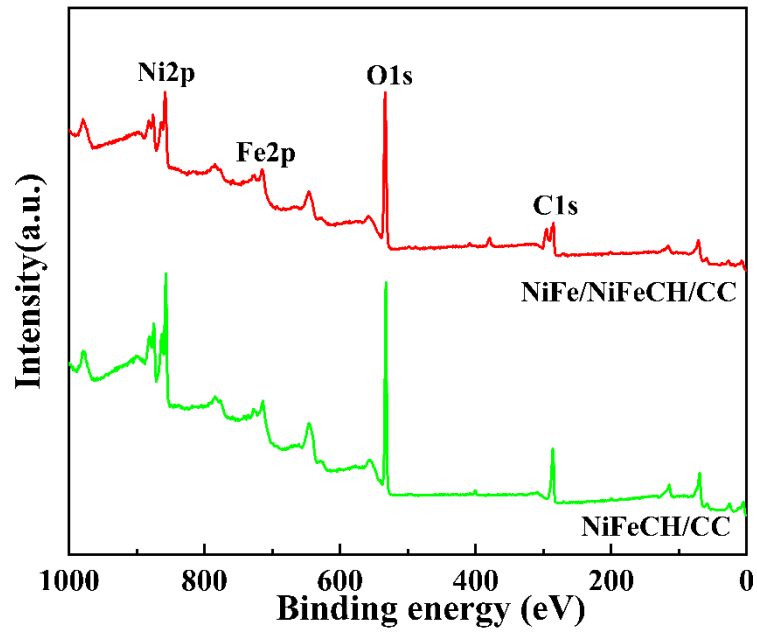

Fig.S6. XPS survey spectrum of NiFeCH and NiFe/NiFeCH/CC.

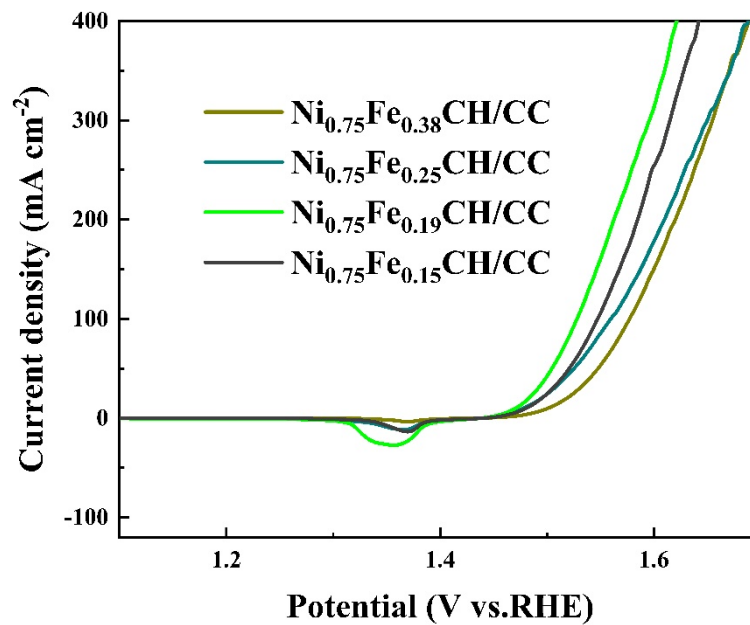

Fig.S7. LSV curves of NiFeCH/CC with different proportions of Ni and Fe.

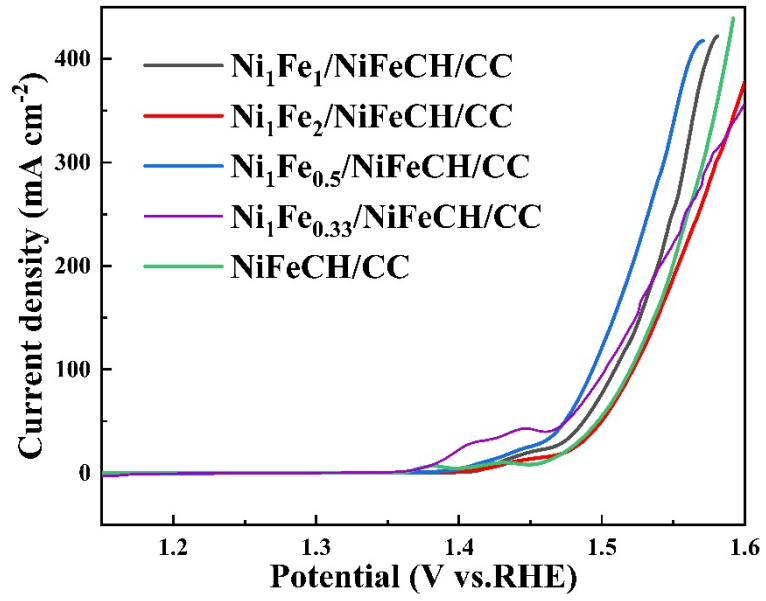

**Fig.S8.** LSV curves of NiFe/NiFeCH/CC with different proportions of Ni and Fe in NiFe alloy.

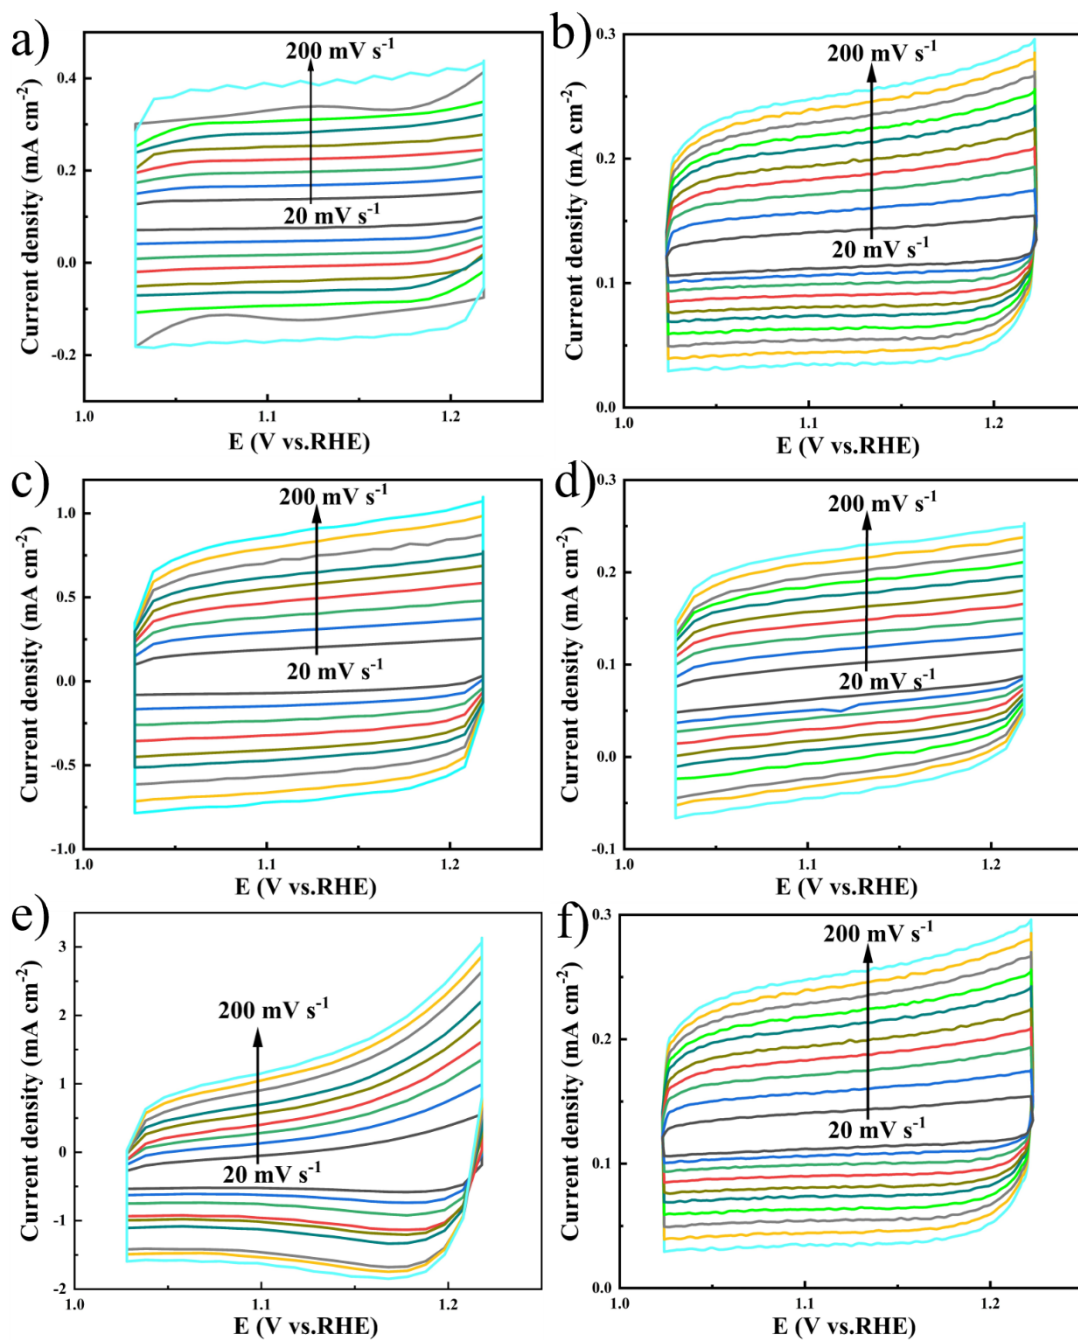

**Fig.S9.** CV curves with various scan rates. (a) NiCH/CC; (b) NiFeCH/CC; (c) Ni/NiFeCH/CC; (d) Fe/NiFeCH/CC; (e) NiFe/NiFeCH/CC; (f) NiFe/CC.

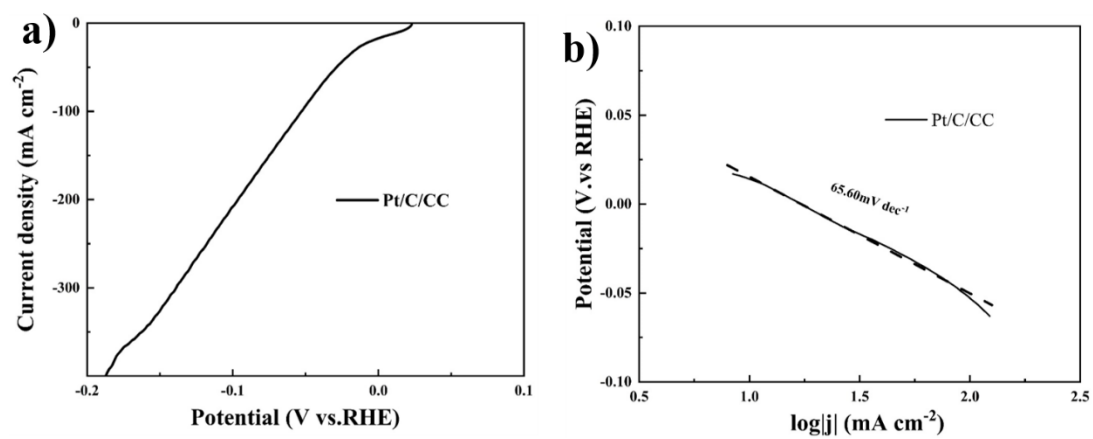

**Fig.S10.** (a) LSV curve and (b) corresponding Tafel plot of Pt/C/CC.

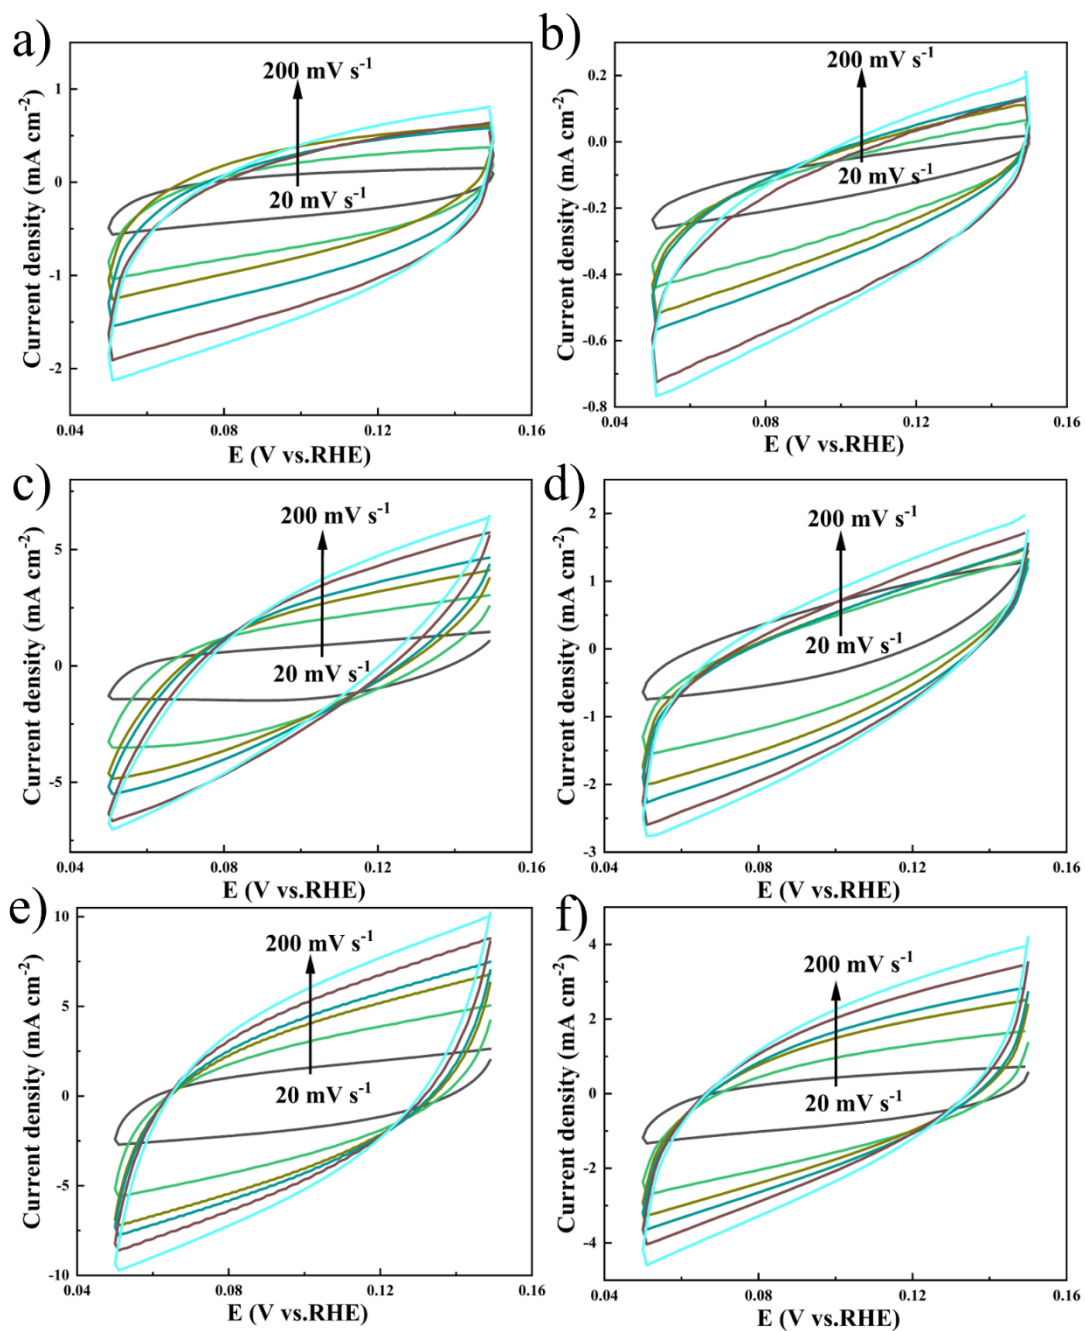

**Fig.S11.** CV curves with various scan rates. (a) NiCH/CC; (b) NiFeCH/CC; (c) Ni/NiFeCH/CC; (d) Fe/NiFeCH/CC; (e) NiFe/NiFeCH/CC; (f) NiFe/CC.



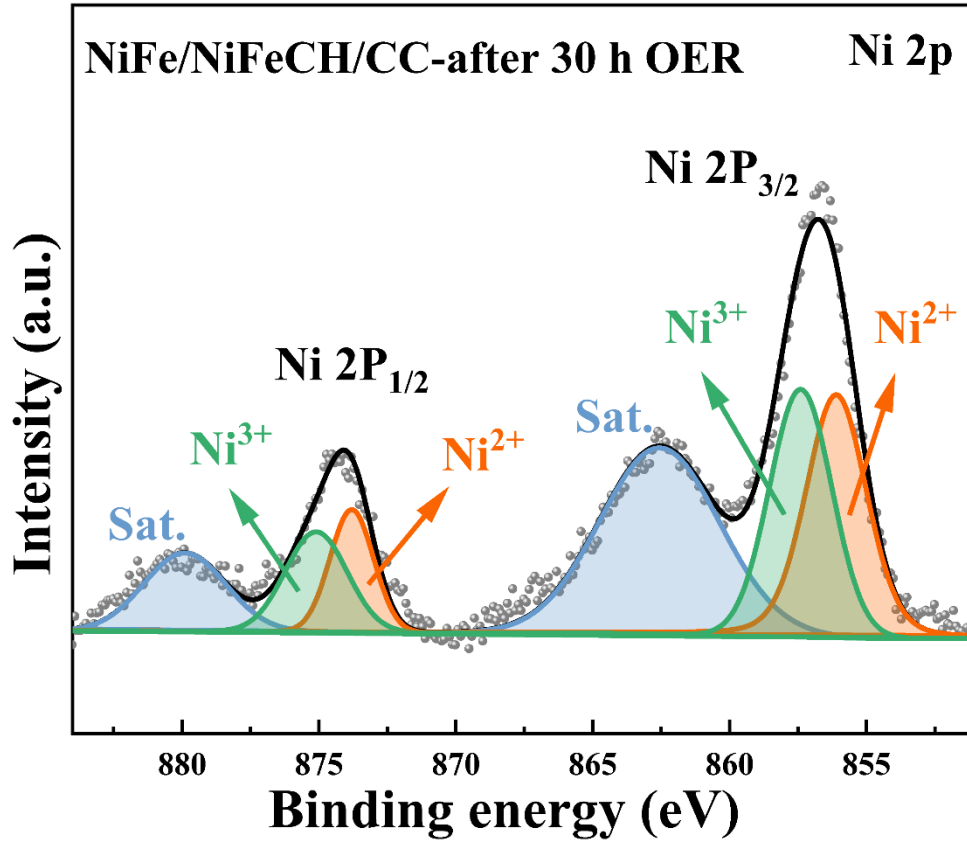

**Fig.S12.** High-resolution XPS spectra of Ni 2p before and after stability test.

**Table S1.** Content of  $C_2H_3NiO_2 \cdot 4H_2O$  and  $FeCl_3 \cdot 6H_2O$  added in hydrothermal reaction for as-prepared  $Ni_{0.75}Fe_xCH$  electrocatalysts

| Electrocatalysts       | $C_2H_3NiO_2 \cdot 4H_2O$ | $FeCl_3 \cdot 6H_2O$ | Ni: Fe |
|------------------------|---------------------------|----------------------|--------|
|                        | (mmol)                    | (mmol)               |        |
| $Ni_{0.75}Fe_{0.38}CH$ | 0.75                      | 0.38                 | 2:1    |
| $Ni_{0.75}Fe_{0.25}CH$ | 0.75                      | 0.25                 | 3:1    |
| $Ni_{0.75}Fe_{0.19}CH$ | 0.75                      | 0.19                 | 4:1    |
| $Ni_{0.75}Fe_{0.15}CH$ | 0.75                      | 0.15                 | 5:1    |

**Table S2.** Content of  $C_2H_3NiO_2 \cdot 4H_2O$  and  $FeCl_3 \cdot 6H_2O$  added in electrochemical deposition reaction for as-prepared  $Ni_1Fe_x/NiFeCH$  electrocatalysts

| <b>Electrocatalysts</b> | <b><math>C_2H_3NiO_2 \cdot 4H_2O</math></b> | <b><math>FeCl_3 \cdot 6H_2O</math></b> | <b>Ni: Fe</b> |
|-------------------------|---------------------------------------------|----------------------------------------|---------------|
|                         | <b>(mol/L)</b>                              | <b>(mol/L)</b>                         |               |
| $Ni_1Fe_1/NiFeCH$       | 0.01                                        | 0.01                                   | 1:1           |
| $Ni_1Fe_2/NiFeCH$       | 0.01                                        | 0.02                                   | 1:2           |
| $Ni_1Fe_{0.5}/NiFeCH$   | 0.01                                        | 0.005                                  | 2:1           |
| $Ni_1Fe_{0.33}/NiFeCH$  | 0.01                                        | 0.0033                                 | 3:1           |

**Table S3.** ICP data for as-prepared  $Ni_{0.75}Fe_xCH$  electrocatalysts.

| <b>Electrocatalysts</b> | <b>Ni (mmol)</b>      | <b>Fe (mmol)</b>     | <b>Ni: Fe (~)</b> |
|-------------------------|-----------------------|----------------------|-------------------|
| $Ni_{0.75}Fe_{0.38}CH$  | $24.7 \cdot 10^{-4}$  | $8.25 \cdot 10^{-4}$ | 3:1               |
| $Ni_{0.75}Fe_{0.25}CH$  | $23.2 \cdot 10^{-4}$  | $5.75 \cdot 10^{-4}$ | 4:1               |
| $Ni_{0.75}Fe_{0.19}CH$  | $23.92 \cdot 10^{-4}$ | $4.6 \cdot 10^{-4}$  | 5:1               |
| $Ni_{0.75}Fe_{0.15}CH$  | $24.3 \cdot 10^{-4}$  | $3.8 \cdot 10^{-4}$  | 6:1               |

**Table S4.** Comparison of OER performance for NiFe/NiFeCH/CC with other bifunctional non-noble metal electrocatalysts tested in 1 M KOH.

| Catalysts                                                               | Substrate    | $\eta$ (mV)            | Stability | Referenc  |
|-------------------------------------------------------------------------|--------------|------------------------|-----------|-----------|
|                                                                         |              | 10 mA cm <sup>-2</sup> | (h)       | e         |
| NiFe/NiFeCH/CC                                                          | CC           | 210                    | 150       | This work |
| Ni <sub>3</sub> FeN/r-GO                                                | Ni foam      | 270                    | 10        | [1]       |
| Co <sub>9</sub> S <sub>8</sub> @MoS <sub>2</sub> /N-doped hollow carbon | /            | 233                    | 12        | [2]       |
| Fe-NiCoP                                                                | Ni foam      | 235                    | 18        | [3]       |
| CoFe/NF                                                                 | Ni foam      | 220                    | 50        | [4]       |
| NiFeOP                                                                  | Ni foam      | 310                    | 12        | [5]       |
| Ni <sub>0.75</sub> Fe <sub>0.25</sub> Se <sub>2</sub> @NF               | Ni foam      | 210                    | 30        | [6]       |
| CoFe <sub>2</sub> O <sub>4</sub> /CoO-CNT                               | /            | 246                    | /         | [7]       |
| Co <sub>2</sub> P/CoP@Co@NCNT                                           | /            | 256                    | 50        | [8]       |
| CoSe <sub>2</sub> @MoSe <sub>2</sub>                                    | CC           | 183.8                  | /         | [9]       |
| Co <sub>4</sub> Ni <sub>1</sub> S/CC                                    | CC           | 296                    | 36        | [10]      |
| Co(OH) <sub>2</sub> /NiMo CA@CC                                         | CC           | 267                    | 24        | [11]      |
| Co-Ni <sub>3</sub> S <sub>2</sub>                                       | Ni foam      | 228                    | 25        | [12]      |
| CoP@FeCoP/NC YSMPs                                                      | Carbon paper | 238                    | 20        | [13]      |

**Table S5.** Comparison of HER performance for NiFe/NiFeCH/CC with other bifunctional non-noble metal electrocatalysts tested in 1 M KOH.

| Catalysts                                                                  | Substrate    | $\eta$ (mV)<br>10 mA<br>cm <sup>-2</sup> | Stability<br>(h) | Referenc<br>e |
|----------------------------------------------------------------------------|--------------|------------------------------------------|------------------|---------------|
| NiFe/NiFeCH/CC                                                             | CC           | 90                                       | 30               | This work     |
| Ni <sub>3</sub> FeN/r-GO                                                   | Ni foam      | 94                                       | 10               | [1]           |
| Co <sub>9</sub> S <sub>8</sub> @MoS <sub>2</sub> /N-doped hollow<br>carbon | /            | 126                                      | 12               | [2]           |
| Fe-NiCoP                                                                   | Ni foam      | 147                                      | 20               | [3]           |
| CoFe/NF                                                                    | Ni foam      | 110                                      | 50               | [4]           |
| NiFeOP                                                                     | Ni foam      | 209                                      | 14               | [5]           |
| Ni <sub>0.75</sub> Fe <sub>0.25</sub> Se <sub>2</sub> @NF                  | Ni foam      | 117                                      | 30               | [6]           |
| CoFe <sub>2</sub> O <sub>4</sub> /CoO-CNT                                  | /            | 164                                      | /                | [7]           |
| Co <sub>2</sub> P/CoP@Co@NCNT                                              | /            | 118                                      | 12               | [8]           |
| CoSe <sub>2</sub> @MoSe <sub>2</sub>                                       | CC           | 109.9                                    | /                | [9]           |
| Co <sub>4</sub> Ni <sub>1</sub> S/CC                                       | CC           | 192                                      | 32               | [10]          |
| Co(OH) <sub>2</sub> /NiMo CA@CC                                            | CC           | 30                                       | 24               | [11]          |
| Co-Ni <sub>3</sub> S <sub>2</sub>                                          | Ni foam      | 102                                      | 25               | [12]          |
| CoP@FeCoP/NC YSMPs                                                         | Carbon paper | 141                                      | 20               | [13]          |

**Table S6.** Comparison of overall water splitting performance for NiFe/NiFeCH/CC with other bifunctional non-noble metal electrocatalysts tested in 1 M KOH.

| Catalysts                                                               | Substrate    | E <sub>10</sub><br>(V) | Stability<br>(h) | Reference |
|-------------------------------------------------------------------------|--------------|------------------------|------------------|-----------|
| NiFe/NiFeCH/CC                                                          | CC           | 1.49                   | 30               | This work |
| Ni <sub>3</sub> FeN/r-GO                                                | Ni foam      | 1.60                   | 100              | [1]       |
| Co <sub>9</sub> S <sub>8</sub> @MoS <sub>2</sub> /N-doped hollow carbon | /            | 1.56                   | 12               | [2]       |
| Fe-NiCoP                                                                | Ni foam      | 1.60                   | 18               | [3]       |
| CoFe/NF                                                                 | Ni foam      | 1.64                   | 50               | [4]       |
| NiFeOP                                                                  | Ni foam      | 1.69                   | 20               | [5]       |
| Ni <sub>0.75</sub> Fe <sub>0.25</sub> Se <sub>2</sub> @NF               | Ni foam      | 1.61                   | 50               | [6]       |
| CoFe <sub>2</sub> O <sub>4</sub> /CoO-CNT                               | /            | 1.61                   | ~60              | [7]       |
| Co <sub>2</sub> P/CoP@Co@NCNT                                           | /            | 1.60                   | 12               | [8]       |
| CoSe <sub>2</sub> @MoSe <sub>2</sub>                                    | CC           | 1.53                   | 24               | [9]       |
| Co <sub>4</sub> Ni <sub>1</sub> S/CC                                    | CC           | 1.60                   | ~10              | [10]      |
| Co(OH) <sub>2</sub> /NiMo CA@CC                                         | CC           | 1.52                   | 30               | [11]      |
| Co-Ni <sub>3</sub> S <sub>2</sub>                                       | Ni foam      | 1.54                   | 25               | [12]      |
| CoP@FeCoP/NC YSMPs                                                      | Carbon paper | 1.68                   | 20               | [13]      |

## References

[1] Y. Gu, S. Chen, J. Ren, Y.A. Jia, C. Chen, S. Komarneni, D. Yang, X. Yao, Electronic Structure

Tuning in Ni<sub>3</sub>FeN/r-GO Aerogel toward Bifunctional Electrocatalyst for Overall Water Splitting, *ACS Nano*, 12 (2018) 245-253.

[2] M. Kim, H. Seok, N. Clament Sagaya Selvam, J. Cho, G.H. Choi, M.G. Nam, S. Kang, T. Kim, P.J. Yoo, Kirkendall effect induced bifunctional hybrid electrocatalyst (Co<sub>9</sub>S<sub>8</sub>@MoS<sub>2</sub>/N-doped hollow carbon) for high performance overall water splitting, *Journal of Power Sources*, 493 (2021) 229688.

[3] B. He, C.Q. Peng, F. Ye, H.W. Gao, Y. Wang, Y.W. Tang, Q.L. Hao, H.K. Liu, Z. Su, Facile formation of Fe-doped NiCoP hollow nanocages as bifunctional electrocatalysts for overall water splitting, *CrystEngComm*, 23 (2021) 3861-3869.

[4] P. Babar, A. Lokhande, H.H. Shin, B. Pawar, M.G. Gang, S. Pawar, J.H. Kim, Cobalt Iron Hydroxide as a Precious Metal-Free Bifunctional Electrocatalyst for Efficient Overall Water Splitting, *Small*, 14 (2018) 1702568.

[5] J. Chen, Z. Guo, Y. Luo, M. Cai, Y. Gong, S. Sun, Z. Li, C.J. Mao, Engineering Amorphous Nickel Iron Oxyphosphide as a Highly Efficient Electrocatalyst toward Overall Water Splitting, *ACS Sustainable Chemistry & Engineering*, 9 (2021) 9436-9443.

[6] X. Hu, Q. Zhou, P. Cheng, S. Su, X. Wang, X. Gao, G. Zhou, Z. Zhang, J. Liu, Nickel-iron selenide polyhedral nanocrystal with optimized surface morphology as a high-performance bifunctional electrocatalyst for overall water splitting, *Applied Surface Science*, 488 (2019) 326-334.

[7] K. Srinivas, Y. Chen, Z. Su, B. Yu, M. Karpuraranjith, F. Ma, X. Wang, W. Zhang, D. Yang, Heterostructural CoFe<sub>2</sub>O<sub>4</sub>/CoO nanoparticles-embedded carbon nanotubes network for boosted overall water-splitting performance, *Electrochimica Acta*, 404 (2022) 139745.

[8] Z. Lu, Y. Cao, J. Xie, J. Hu, K. Wang, D. Jia, Construction of Co<sub>2</sub>P/CoP@Co@NCNT rich-interface to synergistically promote overall water splitting, *Chemical Engineering Journal*, 430 (2022) 132877.

- [9] S.J. Patil, N.R. Chodankar, S.K. Hwang, P.A. Shinde, G. Seeta Rama Raju, K. Shanmugam Ranjith, Y.S. Huh, Y.K. Han, Co-metal–organic framework derived  $\text{CoSe}_2@MoSe_2$  core–shell structure on carbon cloth as an efficient bifunctional catalyst for overall water splitting, *Chemical Engineering Journal*, 429 (2022) 132379.
- [10] Y. Dong, Z. Fang, W. Yang, B. Tang, Q. Liu, Integrated Bifunctional Electrodes Based on Amorphous Co-Ni-S Nanoflake Arrays with Atomic Dispersion of Active Sites for Overall Water Splitting, *ACS Appl Mater Interfaces*, 14 (2022) 10277-10287.
- [11] Q. Zhang, W. Xiao, W.H. Guo, Y.X. Yang, J.L. Lei, H.Q. Luo, N.B. Li, Macroporous Array Induced Multiscale Modulation at the Surface/Interface of  $\text{Co(OH)}_2/\text{NiMo}$  Self-Supporting Electrode for Effective Overall Water Splitting, *Advanced Functional Materials*, (2021) 2102117.
- [12] C. Jin, P. Zhai, Y. Wei, Q. Chen, X. Wang, W. Yang, J. Xiao, Q. He, Q. Liu, Y. Gong,  $\text{Ni(OH)}_2$  Templated Synthesis of Ultrathin  $\text{Ni}_3\text{S}_2$  Nanosheets as Bifunctional Electrocatalyst for Overall Water Splitting, *Small*, 17 (2021) 2102097.
- [13] J. Shi, F. Qiu, W. Yuan, M. Guo, Z.H. Lu, Nitrogen-doped carbon-decorated yolk-shell  $\text{CoP}@FeCoP$  micro-polyhedra derived from MOF for efficient overall water splitting, *Chemical Engineering Journal*, 403 (2021) 126312.
